# Supplementary material
Source: PubMed Central journal article supplement (PMC3748469)
Supplement: SD4.pdf [file SD4.pdf]

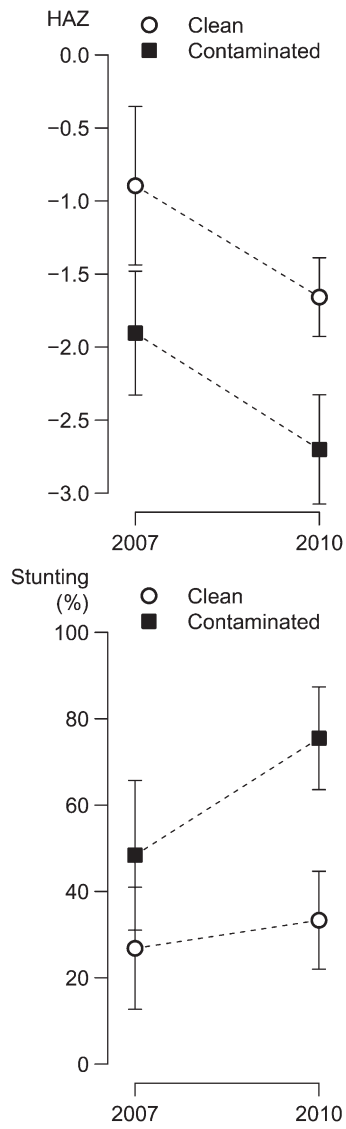

SUPPLEMENTAL FIGURE 1. Mean height-for-age z scores (HAZs) and stunting prevalence in 2007 and 2010 by environmental group. Vertical lines mark bootstrapped 95% confidence intervals (95% CIs).

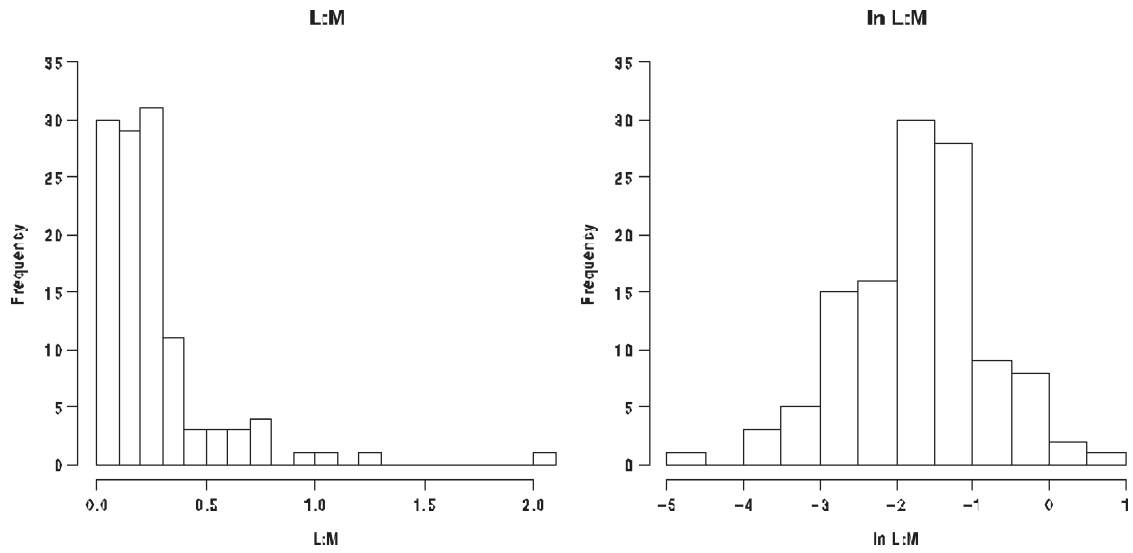

SUPPLEMENTAL FIGURE 2. Histogram distributions of the lactulose:mannitol (L:M) ratio values before and after log transformation.

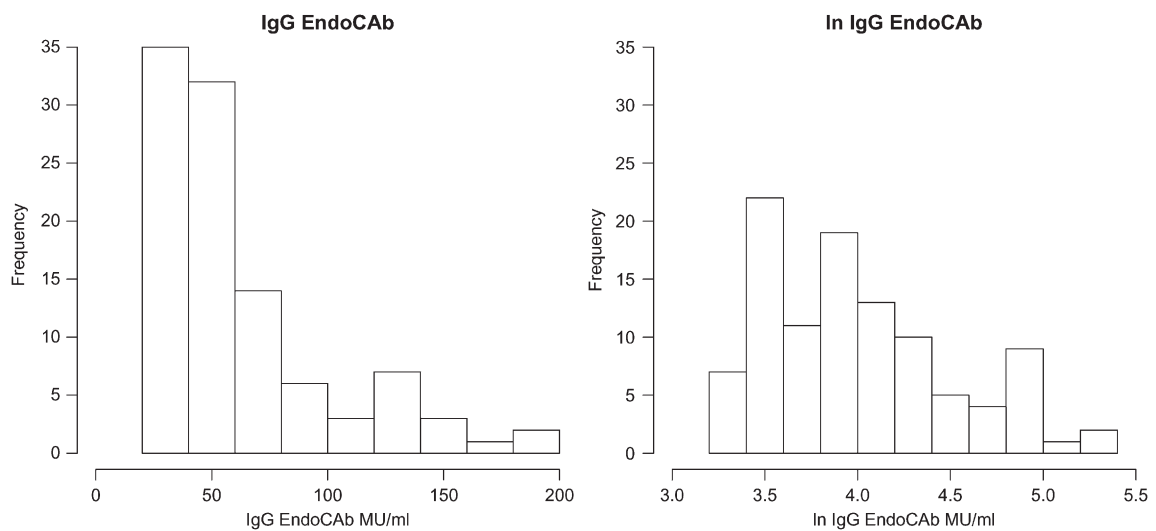

SUPPLEMENTAL FIGURE 3. Histogram distributions of the immunoglobulin G (IgG) endotoxin core antibody (EndoCAb) titer values before and after log transformation. EndoCAb standard median units (MUs) IgG are arbitrary and based on medians of ranges for 1,000 healthy adults in a specific location.

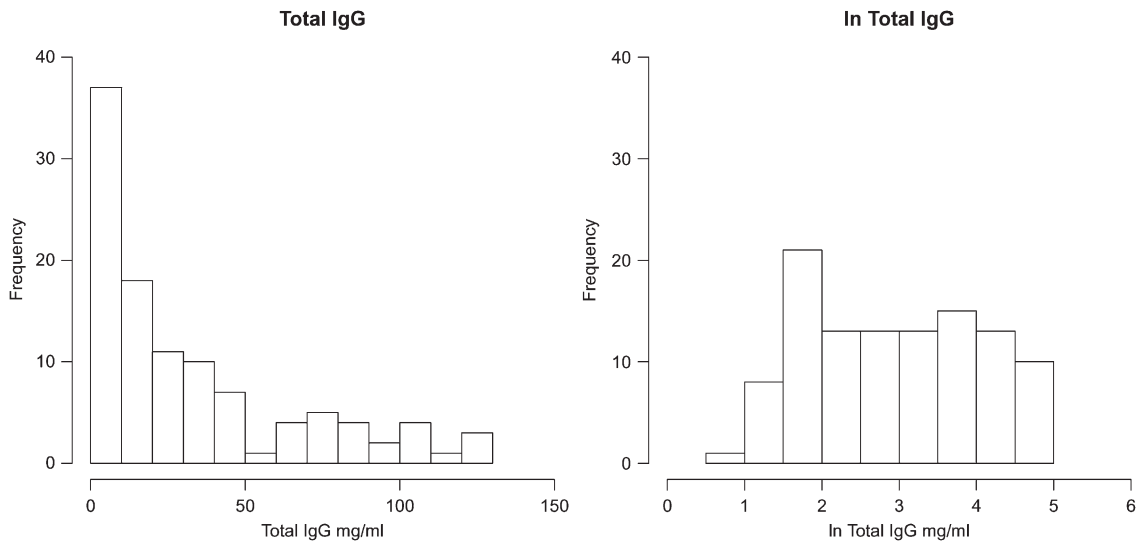

SUPPLEMENTAL FIGURE 4. Histogram distributions of the total IgG titer values before and after log transformation.

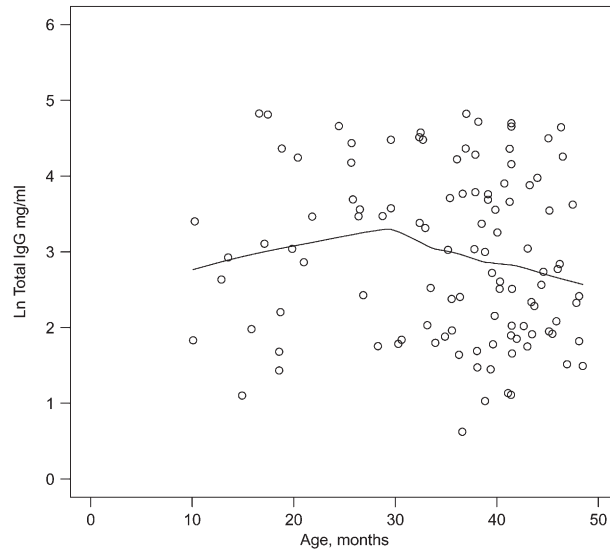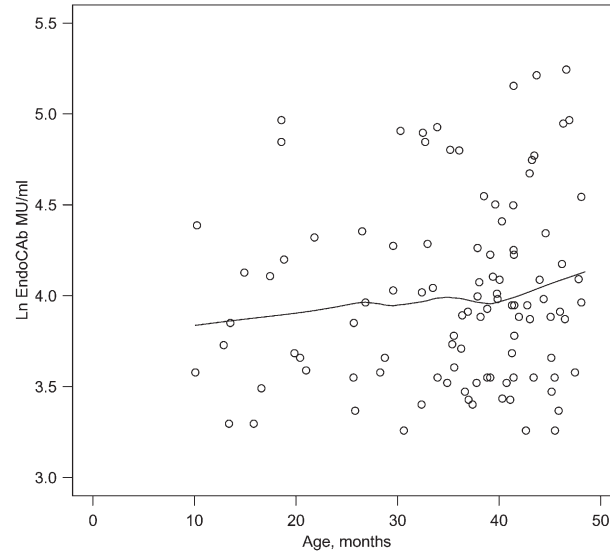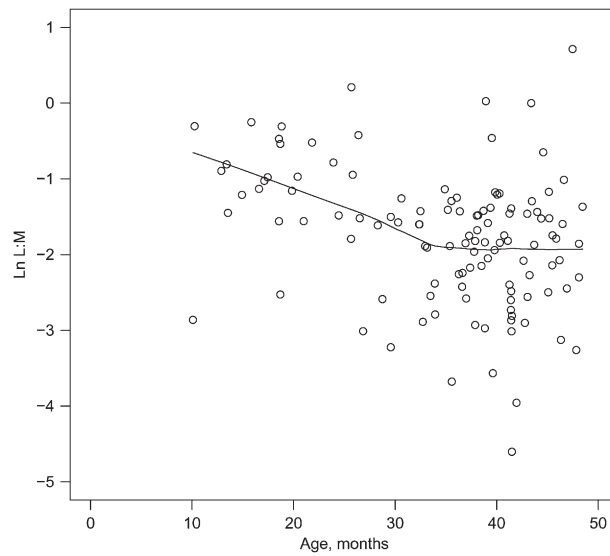

SUPPLEMENTAL FIGURE 5. Total IgG, IgG EndoCAB, and L:M by age. Solid lines are loess smoothers (locally weighted scatterplot smoothing). EndoCAB standard MUs IgG are arbitrary and based on medians of ranges for 1,000 healthy adults in a specific location.

SUPPLEMENTAL TABLE 1

Summary of child and household characteristics in 2007 at enrollment in the Sanitation, Hygiene Education, and Water Supply—Bangladesh (SHEWA-B) study

|                                                                          | Mean | Clean environment (N = 66) | Contaminated environment (N = 53) | Difference | P value* |
|--------------------------------------------------------------------------|------|----------------------------|-----------------------------------|------------|----------|
| <b>Child characteristics</b>                                             |      |                            |                                   |            |          |
| Female                                                                   |      | 0.53                       | 0.58                              | -0.05      | 0.544    |
| Age in months at enrollment in 2007†                                     |      | 9.07                       | 9.26                              | -0.19      | 0.856    |
| Child breastfed during SHEWA-B                                           |      | 0.98                       | 1                                 | -0.02      | 0.317    |
| <b>Household characteristics</b>                                         |      |                            |                                   |            |          |
| Self-owned home                                                          |      | 0.94                       | 0.87                              | 0.07       | 0.240    |
| Number of people living in the household                                 |      | 5.92                       | 6.3                               | -0.38      | 0.508    |
| Use of biofuel                                                           |      | 1.00                       | 1.00                              | 0.00       | ‡        |
| Own any homestead land                                                   |      | 0.97                       | 0.91                              | 0.06       | 0.166    |
| Own any land other than homestead land                                   |      | 0.73                       | 0.36                              | 0.37       | < 0.001  |
| Agricultural/non-agricultural labor, boarman, shoe/umbrella mechanic     |      | 0.14                       | 0.38                              | -0.24      | 0.007    |
| Household head: skilled worker/professional                              |      | 0.06                       | 0.06                              | 0          | 0.927    |
| Household head: traders/business occupation                              |      | 0.23                       | 0.11                              | 0.12       | 0.157    |
| Number of rooms in the household (excluding bathroom and kitchen)        |      | 2.94                       | 1.83                              | 1.11       | < 0.001  |
| Have electricity                                                         |      | 0.73                       | 0.38                              | 0.35       | < 0.001  |
| Thatch roof                                                              |      | 0.03                       | 0.04                              | -0.01      | 0.827    |
| Jute/bamboo/mud walls                                                    |      | 0.24                       | 0.34                              | -0.10      | 0.291    |
| Earth/bamboo floor                                                       |      | 0.70                       | 0.92                              | -0.22      | 0.002    |
| <b>Durable good ownership</b>                                            |      |                            |                                   |            |          |
| Number of wardrobes                                                      |      | 0.55                       | 0.42                              | 0.13       | 0.343    |
| Number of tables                                                         |      | 2.12                       | 0.81                              | 1.31       | < 0.001  |
| Number of chairs or benches                                              |      | 3.85                       | 1.34                              | 2.51       | < 0.001  |
| Number of watches or clocks                                              |      | 2.56                       | 1.25                              | 1.31       | 0.001    |
| Number of beds/bed frames                                                |      | 1.65                       | 0.36                              | 1.29       | < 0.001  |
| Number of basic beds                                                     |      | 1.62                       | 1.6                               | 0.02       | 0.949    |
| Have a radio that is working                                             |      | 0.29                       | 0.17                              | 0.12       | 0.135    |
| Have a black and white television that is working                        |      | 0.32                       | 0.15                              | 0.17       | 0.046    |
| Have a color television that is working                                  |      | 0.23                       | 0.06                              | 0.17       | 0.011    |
| Have refrigerator                                                        |      | 0.06                       | 0                                 | 0.06       | 0.041    |
| Have a bicycle (used for commercial purposes and not a toy for children) |      | 0.36                       | 0.15                              | 0.21       | 0.012    |
| Have a motorcycle                                                        |      | 0.11                       | 0                                 | 0.11       | 0.006    |
| Have a sewing machine                                                    |      | 0.14                       | 0                                 | 0.14       | 0.016    |
| Have a land phone                                                        |      | 0.02                       | 0                                 | 0.02       | 0.317    |
| <b>Water supply conditions</b>                                           |      |                            |                                   |            |          |
| Shallow tube well                                                        |      | 0.85                       | 0.75                              | 0.1        | 0.251    |
| Deep tube well                                                           |      | 0.05                       | 0.08                              | -0.03      | 0.506    |
| Number of households sharing water point                                 |      | 0.95                       | 2.11                              | -1.16      | < 0.001  |
| <b>Sanitation conditions</b>                                             |      |                            |                                   |            |          |
| Type of toilet facility that households usually use                      |      |                            |                                   |            |          |
| Septic tank                                                              |      | 0.47                       | 0                                 | 0.47       | < 0.001  |
| Flush to offset pit latrine                                              |      | 0.26                       | 0                                 | 0.26       | < 0.001  |
| Pit latrine with slab and water seal                                     |      | 0.27                       | 0                                 | 0.27       | < 0.001  |
| Flush or pour flush toilet connected to somewhere else                   |      | 0                          | 0.06                              | -0.06      | 0.167    |
| Pit latrine without slab/open pit                                        |      | 0                          | 0.08                              | -0.08      | 0.041    |
| Pit latrine with slab and no water seal/broken water seal                |      | 0                          | 0.70                              | -0.70      | < 0.001  |
| Hanging toilet/latrine                                                   |      | 0                          | 0.06                              | -0.06      | 0.079    |
| No facility/bush/field                                                   |      | 0                          | 0.11                              | -0.11      | 0.025    |
| Stool visible on slab or floor                                           |      | 0.21                       | 0.75                              | -0.54      | < 0.001  |
| Child age < 5 years feces disposal in no specific place/bush/field       |      | 0.79                       | 0.83                              | -0.04      | 0.57     |
| <b>Hygiene conditions</b>                                                |      |                            |                                   |            |          |
| Handwashing station with water                                           |      | 1                          | 0.49                              | 0.51       | < 0.001  |
| Handwashing station with soap/detergent                                  |      | 1                          | 0.19                              | 0.81       | < 0.001  |
| Washing both hands with soap or ash before preparing food                |      | 0.19                       | 0.19                              | 0          | 0.988    |
| Washing both hands with soap or ash before eating                        |      | 0.17                       | 0.13                              | 0.04       | 0.636    |
| Fingernails of the child are clean                                       |      | 0.20                       | 0.08                              | 0.12       | 0.061    |
| Palms of the child are clean                                             |      | 0.43                       | 0.17                              | 0.26       | 0.005    |
| Fingerpads of the child are clean                                        |      | 0.41                       | 0.15                              | 0.26       | 0.003    |
| Fingernails of the respondent are clean                                  |      | 0.38                       | 0.11                              | 0.27       | 0.002    |
| Palms of the respondent are clean                                        |      | 0.67                       | 0.53                              | 0.14       | 0.174    |
| Fingerpads of the respondent are clean                                   |      | 0.65                       | 0.51                              | 0.14       | 0.165    |

\*P values calculated using robust SEs that account for clustering at the household level.

†N = 42 clean environment, N = 31 contaminated environment (other children born after the 2007 survey).

‡P value cannot be calculated, because there is no variation in either group.

SUPPLEMENTAL TABLE 2

Summary of fieldworker guesses of group membership (clean and contaminated) compared with actual group membership measured in 2010

| Field team guess of household cleanliness | Actual household status        |                                       |
|-------------------------------------------|--------------------------------|---------------------------------------|
|                                           | Clean environment <i>N</i> (%) | Contaminated environment <i>N</i> (%) |
| Definitely a clean environment            | 6 (10)                         | 2 (4)                                 |
| Probably a clean environment              | 31 (51)                        | 9 (20)                                |
| Probably a dirty environment              | 16 (26)                        | 17 (38)                               |
| Definitely a dirty environment            | 8 (13)                         | 17 (38)                               |

Fieldworkers were blinded to household environmental classifications (clean or contaminated). At the end of their visit to each household, fieldworkers were asked to guess the household environmental group given four choices: definitely a clean environment, probably a clean environment, probably a dirty environment, or definitely a dirty environment. Data were not recorded for 13 of 119 households.

SUPPLEMENTAL TABLE 3  
Parasite infection prevalence measured in 2010

| Parasite prevalence (%)                        | Clean environment |            | Contaminated environment |            | Difference | 95% CI      |
|------------------------------------------------|-------------------|------------|--------------------------|------------|------------|-------------|
|                                                | Percent           | 95% CI     | Percent                  | 95% CI     |            |             |
| <i>Ascaris lumbricoides</i> *                  |                   |            |                          |            |            |             |
| Prevalent infections, < 5 years                | 7.5               | 0.0, 18.0  | 20.7                     | 11.1, 32.3 | -13.2      | -27.0, 1.0  |
| Low infection intensity, < 5 years             | 4.5               | 0.0, 9.7   | 6.9                      | 1.5, 14.3  | -2.4       | -10.7, 5.5  |
| Moderate/heavy infection intensity, < 5 years  | 3.0               | 0.0, 9.4   | 13.8                     | 4.7, 24.1  | -10.8      | -22.8, 0.5  |
| Prevalent infections, < 20 years               | 7.5               | 1.2, 15.8  | 16.1                     | 8.1, 26.1  | -8.6       | -20.6, 3.2  |
| Low infection intensity, < 20 years            | 5.0               | 1.1, 9.9   | 6.9                      | 1.9, 13.2  | -1.9       | -9.3, 5.2   |
| Moderate/heavy infection intensity, < 20 years | 2.5               | 0.0, 8.2   | 9.2                      | 3.0, 16.6  | -6.7       | -15.6, 1.4  |
| <i>Trichuris trichiura</i>                     |                   |            |                          |            |            |             |
| Prevalent infections, < 5 years                | 10.4              | 3.4, 17.6  | 13.8                     | 4.4, 24.1  | -3.3       | -16.2, 8.1  |
| Low infection intensity, < 5 years             | 10.4              | 3.4, 17.6  | 10.3                     | 3.3, 19.0  | 0.1        | -11.2, 10.5 |
| Moderate/heavy infection intensity, < 5 years  | 0.0               | 0.0, 0.0   | 3.4                      | 0.0, 8.8   | -3.4       | -8.8, 0.0   |
| Prevalent infections, < 20 years               | 8.8               | 3.0, 15.6  | 10.3                     | 3.2, 20.2  | -1.6       | -12.9, 8.1  |
| Low infection intensity, < 20 years            | 8.8               | 3.0, 15.6  | 8.0                      | 2.1, 15.7  | 0.7        | -8.5, 9.7   |
| Moderate/heavy infection intensity, < 20 years | 0.0               | 0.0, 0.0   | 2.3                      | 0.0, 6.1   | -2.3       | -6.1, 0.0   |
| Hookworm                                       |                   |            |                          |            |            |             |
| Prevalent infections, < 5 years                | 0.0               | †          | 0.0                      | -          |            |             |
| Prevalent infections, < 20 years               | 0.0               | -          | 0.0                      | -          |            |             |
| <i>Giardia</i> sp.                             |                   |            |                          |            |            |             |
| Prevalent infections, < 5 years                | 34.3              | 22.9, 46.3 | 37.3                     | 26.2, 50.0 | -3.0       | -19.3, 14.0 |
| Prevalent infections, < 20 years               | 36.3              | 25.3, 47.0 | 38.6                     | 28.0, 49.2 | -2.4       | -17.7, 12.7 |
| <i>Cryptosporidium</i> sp.                     |                   |            |                          |            |            |             |
| Prevalent infections, < 5 years                | 1.5               | 0.0, 4.9   | 1.7                      | 0.0, 5.4   | -0.2       | -4.6, 4.3   |
| Prevalent infections, < 20 years               | 1.3               | 0.0, 4.1   | 1.1                      | 0.0, 3.7   | 0.1        | -3.2, 3.7   |
| <i>Entamoeba histolytica</i>                   |                   |            |                          |            |            |             |
| Prevalent infections, < 5 years                | 0.0               | -          | 0.0                      | -          |            |             |
| Prevalent infections, < 20 years               | 0.0               | -          | 0.0                      | -          |            |             |

Population < 5 years: *N* = 67 clean and *N* = 58 contaminated for helminth samples; *N* = 67 clean and *N* = 59 contaminated for protozoan samples. Population < 20 years: *N* = 80 clean and *N* = 87 contaminated for helminth samples; *N* = 80 clean and *N* = 88 contaminated for protozoan samples. 95% CI = 95% confidence interval.

\*Definitions of infection intensity follow World Health Organization guidelines: *Ascaris* moderate/heavy infection  $\geq$  5,000 eggs per gram; *Trichuris* moderate/heavy infection  $\geq$  1,000 eggs per gram.

† CIs and differences not estimated because of zero prevalence in both groups.

SUPPLEMENTAL TABLE 4

Differences between groups in anthropometry measured at enrollment in 2007 and diarrhea prevalence measured over the next 24 months during the original cohort study<sup>16</sup>

| Characteristic                                 | Clean environment |       | Contaminated environment |       | Difference | 95% CI       |
|------------------------------------------------|-------------------|-------|--------------------------|-------|------------|--------------|
|                                                | Mean              | SD    | Mean                     | SD    |            |              |
| HAZ                                            | -0.90             | -1.80 | -1.90                    | 1.26  | 1.01       | 0.28, 1.74   |
| WAZ                                            | -0.99             | -1.27 | -1.98                    | 1.14  | 0.99       | 0.42, 1.56   |
| WHZ                                            | -0.55             | -1.30 | -1.19                    | 1.06  | 0.65       | 0.08, 1.21   |
| Proportion HAZ < -2                            | 0.27              | 0.45  | 0.48                     | 0.51  | -0.22      | -0.45, 0.02  |
| Proportion WAZ < -2                            | 0.21              | 0.42  | 0.48                     | 0.51  | -0.27      | -0.49, -0.05 |
| Proportion WHZ < -2                            | 0.20              | 0.40  | 0.19                     | 0.40  | 0.001      | -0.19, 0.19  |
| Diarrhea longitudinal prevalence 2007-2009 (%) | 11.67             | 32.12 | 15.58                    | 36.29 | -3.91      | -8.46, -0.63 |

*N* = 41 children in clean environment; *N* = 31 children in contaminated environment. Diarrhea longitudinal follow-up: *N* = 1,345 visits for the clean environment group and *N* = 1,001 visits for the contaminated environment group. WAZ = weight-for-age z score; WHZ = weight-for-height z score.

<sup>16</sup>Huda TM, Unicomb L, Johnston RB, Halder AK, Yushuf Sharker MA, Luby SP, 2012. Interim evaluation of a large scale sanitation, hygiene and water improvement programme on childhood diarrhea and respiratory disease in rural Bangladesh. *Soc Sci Med* 75: 604-611.

SUPPLEMENTAL TABLE 5

Anthropometry measured in 2010 after the fieldworkers revisited each household

| Characteristic      | Clean environment |      | Contaminated environment |      | Difference | 95% CI       |
|---------------------|-------------------|------|--------------------------|------|------------|--------------|
|                     | Mean              | SD   | Mean                     | SD   |            |              |
| HAZ                 | -1.66             | 1.15 | -2.57                    | 1.33 | 0.91       | 0.47, 1.36   |
| WAZ                 | -1.62             | 1.08 | -2.04                    | 1.14 | 0.42       | 0.02, 0.83   |
| WHZ                 | -0.99             | 0.98 | -0.86                    | 1.22 | -0.12      | -0.54, 0.30  |
| HCZ                 | -1.82             | 1.00 | -2.12                    | 0.98 | 0.30       | -0.05, 0.65  |
| Proportion HAZ < -2 | 0.33              | 0.48 | 0.74                     | 0.45 | -0.40      | -0.57, -0.23 |
| Proportion WAZ < -2 | 0.33              | 0.48 | 0.49                     | 0.50 | -0.16      | -0.45, -0.03 |
| Proportion WHZ < -2 | 0.11              | 0.31 | 0.09                     | 0.30 | 0.01       | -0.10, 0.13  |

*N* = 66 children in clean environment; *N* = 53 children in contaminated environment. HCZ = head circumference-for-age z score.

SUPPLEMENTAL TABLE 6

Linear regression estimates of the association between environmental enteropathy biomarkers and anthropometry z scores among all children with biomarker measurements measured in 2010 ( $N = 107$  for Total IgG;  $N = 117$  for EndoCAB and L:M ratio)

| Outcome | Ln total IgG        |                      | Ln IgG EndoCAB      |                      | Ln L:M ratio        |                      |
|---------|---------------------|----------------------|---------------------|----------------------|---------------------|----------------------|
|         | Unadjusted          | Age and sex adjusted | Unadjusted          | Age and sex adjusted | Unadjusted          | Age and sex adjusted |
| HAZ     | -0.01 (-0.23, 0.22) | 0.02 (-0.22, 0.26)   | -0.07 (-0.20, 0.05) | -0.08 (-0.20, 0.04)  | -0.24 (-0.52, 0.05) | -0.33 (-0.62, -0.05) |
| WAZ     | -0.04 (-0.20, 0.13) | -0.004 (-0.18, 0.17) | -0.01 (-0.12, 0.10) | -0.02 (-0.13, 0.09)  | -0.16 (-0.37, 0.04) | -0.24 (-0.47, -0.01) |
| WHZ     | -0.07 (-0.25, 0.11) | -0.04 (-0.22, 0.14)  | 0.05 (-0.04, 0.14)  | 0.04 (-0.05, 0.13)   | -0.07 (-0.28, 0.14) | -0.09 (-0.34, 0.16)  |
| HCZ     | -0.05 (-0.12, 0.21) | -0.02 (-0.14, 0.19)  | -0.04 (-0.12, 0.04) | -0.03 (-0.11, 0.06)  | 0.04 (-0.19, 0.26)  | -0.04 (-0.28, 0.19)  |

EndoCAB standard MUs IgG are arbitrary and based on medians of ranges for 1,000 healthy adults in a specific location.

SUPPLEMENTAL TABLE 7

Robustness check comparisons of different estimators for the difference between outcomes in children from clean and contaminated household environments measured in 2010

| Outcome                                | Unadjusted difference | Age- and sex-adjusted difference | Fully adjusted* difference | Mahalanobis matched† difference | GenMatch‡ difference |
|----------------------------------------|-----------------------|----------------------------------|----------------------------|---------------------------------|----------------------|
| <i>Ascaris</i> , proportion infected   | -0.14 (-0.30, 0.02)   | -0.12 (-0.28, 0.04)              | -0.12 (-0.30, 0.06)        | -0.20 (-0.35, -0.05)            | -0.24 (-0.42, -0.07) |
| <i>Trichuris</i> , proportion infected | -0.05 (-0.18, 0.09)   | -0.05 (-0.18, 0.08)              | 0.02 (-0.13, 0.17)         | -0.04 (-0.19, 0.11)             | -0.10 (-0.27, 0.08)  |
| <i>Giardia</i> , proportion infected   | -0.02 (-0.20, 0.16)   | -0.02 (-0.19, 0.16)              | 0.01 (-0.21, 0.23)         | -0.02 (-0.21, 0.18)             | 0.05 (-0.16, 0.26)   |
| Ln total IgG (mg/mL)                   | -0.33 (-0.76, 0.09)   | -0.32 (-0.74, 0.10)              | -0.60 (-1.05, -0.14)       | -0.45 (-0.91, 0.01)             | -0.32 (-0.80, 0.16)  |
| Standardized ln total IgG              | -0.30 (-0.69, 0.08)   | -0.29 (-0.67, 0.09)              | -0.54 (-0.95, -0.13)       | -0.41 (-0.82, 0.01)             | -0.29 (-0.73, 0.14)  |
| Ln EndoCAB (MU/mL)                     | -0.58 (-1.30, 0.14)   | -0.66 (-1.40, 0.07)              | -0.48 (-1.29, 0.33)        | -1.02 (-1.95, -0.09)            | -1.01 (-1.99, -0.03) |
| Standardized ln EndoCAB                | -0.29 (-0.64, 0.07)   | -0.33 (-0.69, 0.04)              | -0.24 (-0.63, 0.16)        | -0.50 (-0.96, -0.05)            | -0.50 (-0.98, -0.02) |
| Ln L:M ratio                           | -0.37 (-0.68, -0.06)  | -0.28 (-0.60, 0.04)              | -0.29 (-0.64, 0.07)        | -0.35 (-0.74, 0.05)             | -0.18 (-0.63, 0.26)  |
| Standardized ln L:M ratio              | -0.42 (-0.77, -0.07)  | -0.31 (-0.67, 0.05)              | -0.32 (-0.72, 0.08)        | -0.39 (-0.83, 0.06)             | -0.20 (-0.70, 0.30)  |
| HAZ                                    | 0.91 (0.17, 1.65)     | 0.96 (0.51, 1.41)                | 0.54 (0.06, 1.01)          | 0.70 (0.22, 1.18)               | 0.65 (0.13, 1.18)    |
| WAZ                                    | 0.42 (0.02, 0.83)     | 0.48 (0.08, 0.88)                | 0.04 (-0.48, 0.55)         | 0.24 (-0.22, 0.70)              | 0.11 (-0.42, 0.63)   |
| WHZ                                    | -0.12 (-0.54, 0.30)   | -0.10 (-0.52, 0.32)              | -0.19 (-0.61, 0.24)        | -0.22 (-0.68, 0.24)             | -0.36 (-0.85, 0.13)  |
| HCZ                                    | 0.30 (-0.05, 0.65)    | 0.36 (0.02, 0.71)                | 0.08 (-0.36, 0.53)         | 0.16 (-0.24, 0.57)              | 0.19 (-0.26, 0.65)   |
| Proportion HAZ < -2                    | -0.40 (-0.57, -0.24)  | -0.42 (-0.59, -0.26)             | -0.22 (-0.42, -0.02)       | -0.30 (-0.49, -0.11)            | -0.28 (-0.50, -0.05) |
| Proportion WAZ < -2                    | -0.16 (-0.34, 0.02)   | -0.17 (-0.34, 0.01)              | -0.02 (-0.26, 0.22)        | -0.08 (-0.28, 0.11)             | 0.01 (-0.24, 0.26)   |
| Proportion WHZ < -2                    | 0.01 (-0.10, 0.13)    | 0.004 (-0.11, 0.12)              | 0.10 (-0.03, 0.23)         | 0.01 (-0.13, 0.14)              | 0.04 (-0.11, 0.19)   |

Columns 1-3 repeat information presented in the text (Table 1 and 2) to facilitate the comparison. Estimates are clean minus contaminated (95% CIs). All estimates are restricted to the children from the original SHEWA-B sample < 4 years old ( $N = 119$  for anthropometry,  $N = 118$  for enteropathy biomarkers,  $N = 116$  for parasitic infections). EndoCAB standard MUs IgG are arbitrary and based on medians of ranges for 1,000 healthy adults in a specific location.

\*Fully adjusted models adjust for age, age squared, sex, household head occupation, land ownership other than the homestead, number of people in the household, number of rooms in the house, house floor materials, house wall materials, house electricity, and asset ownership (tables, watches, beds, radio, television, and/or bicycle). The text has details on the model selection process.

† Matching estimators include the adjustment covariates used in fully adjusted models plus the propensity score estimated using main effects of the covariates.
